# Supplementary material for: Cheap, facile, and upscalable activated carbon-based photothermal layers for solar steam generation
Source: PubMed Central journal article supplement — RSC Adv. 2020 Nov 23;10(69):42432–40. doi: 10.1039/d0ra07746a (PMC9119321; doi:10.1039/d0ra07746a), 2020-11-23
Supplement: RA-010-D0RA07746A-s003.pdf [file RA-010-D0RA07746A-s003.pdf]

Supplementary materials

## **Cheap, Facile, and Upscalable Activated Carbon-based Photothermal Layers for Solar Steam Generation**

*Anush Mnoyan<sup>1,†</sup>, Myeongil Choi<sup>1,†</sup>, Dong Hyun Kim<sup>1</sup>, BonJun Ku<sup>1</sup>, Hyunjung Kim<sup>1</sup>, Kyung Jin Lee<sup>2</sup>, Ahmed S. Yasin<sup>1</sup>, Sungchan Nam<sup>3,\*</sup>, Kyubock Lee<sup>1,\*</sup>*

1 Graduate School of Energy Science and Technology, Chungnam National University, 99 Daehak-ro, Yuseong-gu, Daejeon, 34134, Republic of Korea

2 Department of Chemical Engineering and Applied Chemistry, College of Engineering, Chungnam National University, 99 Daehak-ro, Yuseong-gu, Daejeon, 34134, Republic of Korea

3 Greenhouse Gas Research Laboratory, Korea Institute of Energy Research, 152 Gajeong-ro, Yuseong-gu, Daejeon, 34129, Republic of Korea

\*Corresponding author. Tel: 82 42-821-8610. E-mail: scnam@kier.re.kr (Sungchan Nam), kyubock.lee@cnu.ac.kr (Kyubock Lee)

†The first two authors contributed equally to this paper.

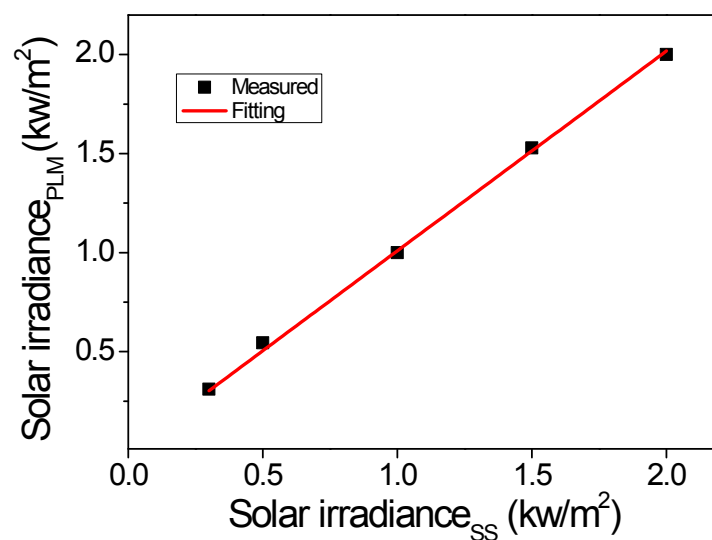

**Figure S1.** Plot of solar irradiation measured by portable light meter versus solar irradiation provided by solar simulator calibrated with photovoltaic reference cell.

**Table S1.** BET surface area, mean pore size, pore volume and ranges of particle size of the three commercial activated carbons.

|         | BET surface area (m <sup>2</sup> /g) | Mean pore size (nm) | Pore volume (cm <sup>3</sup> /g) | Ranges of particle size (μm) |
|---------|--------------------------------------|---------------------|----------------------------------|------------------------------|
| DUKSAN  | 987.49                               | 2.21                | 0.5457                           | 6-30                         |
| CEP21KS | 1722.90                              | 2.28                | 0.9818                           | 7-9                          |
| YP50F   | 1747.00                              | 1.89                | 0.8270                           | 8-10                         |

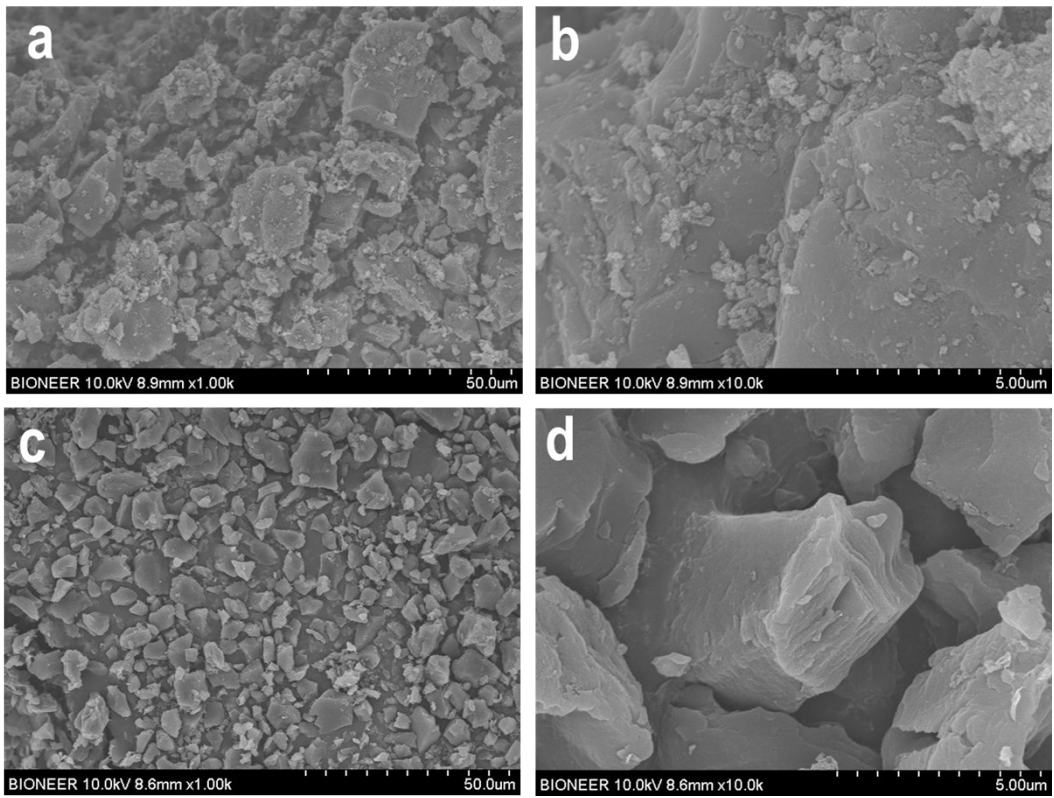

**Figure S2.** SEM images of (a,b) ACLA-D, (c,d) ACLA-Y samples (top view).

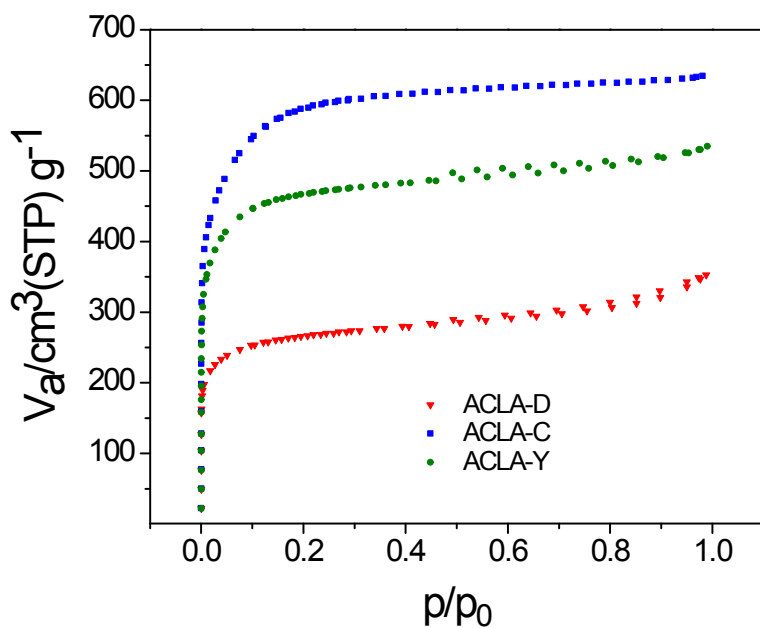

**Figure S3.**  $N_2$  adsorption-desorption patterns of the commercial activated carbon samples.

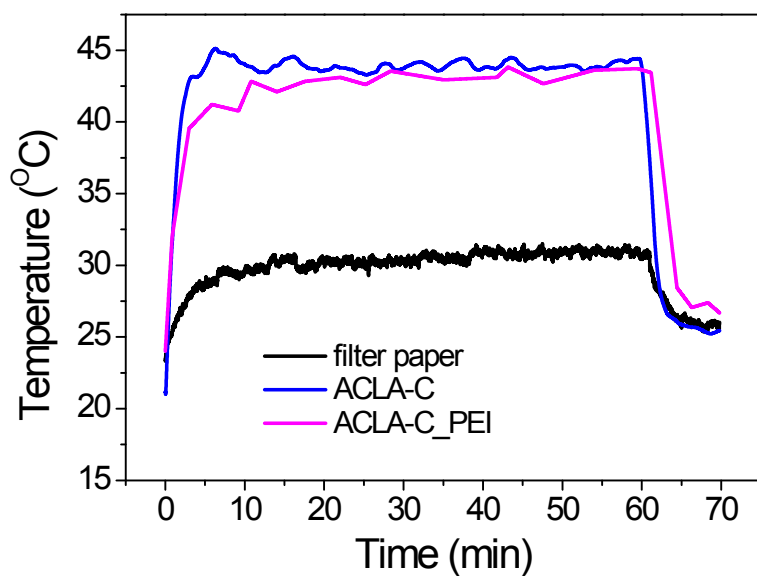

**Figure S4.** Surface temperature profiles of the bare filter paper, ACLA-C and ACLA-C\_PEI in wet condition monitored during solar-to-steam generation under 1 sun irradiance.

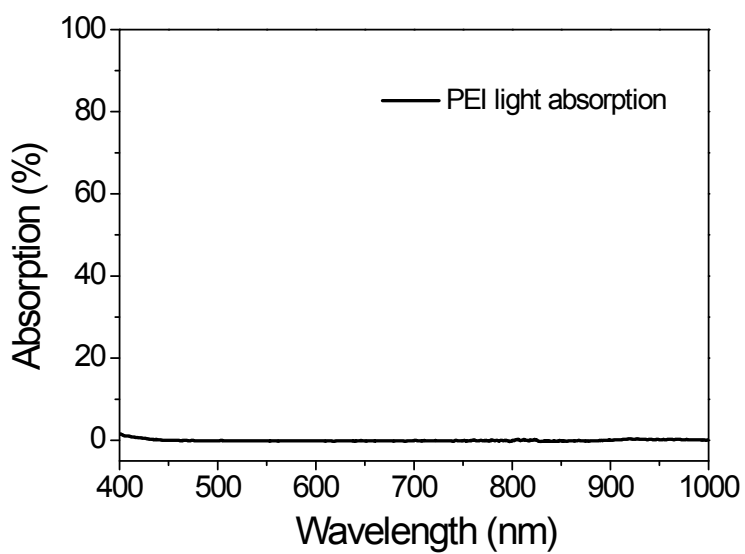

**Figure S5.** Light absorption of PEI.

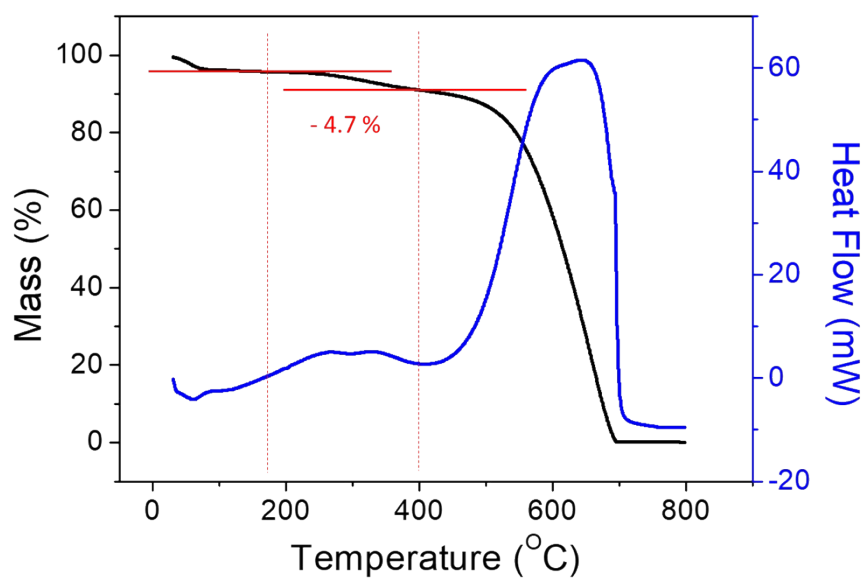

**Figure S6.** TGA-DSC analysis of PEI-treated AC-C.

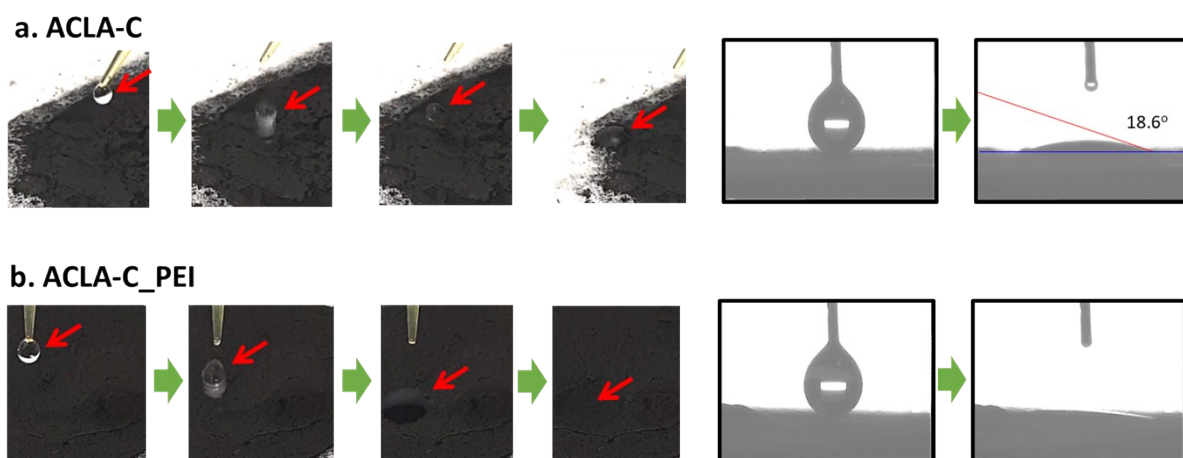

**Figure S7.** a) The snapshots of the movie (Movie S1) showing a water droplet repelled from the surface of dry ACLA-C and the contact angle measurement of wet ACLA-C. b) The snapshots of the movie (Movie S2) showing a water droplet spreading and soaking on the surface of dry ACLA-C\_PEI and the contact angle measurement (not measurable).

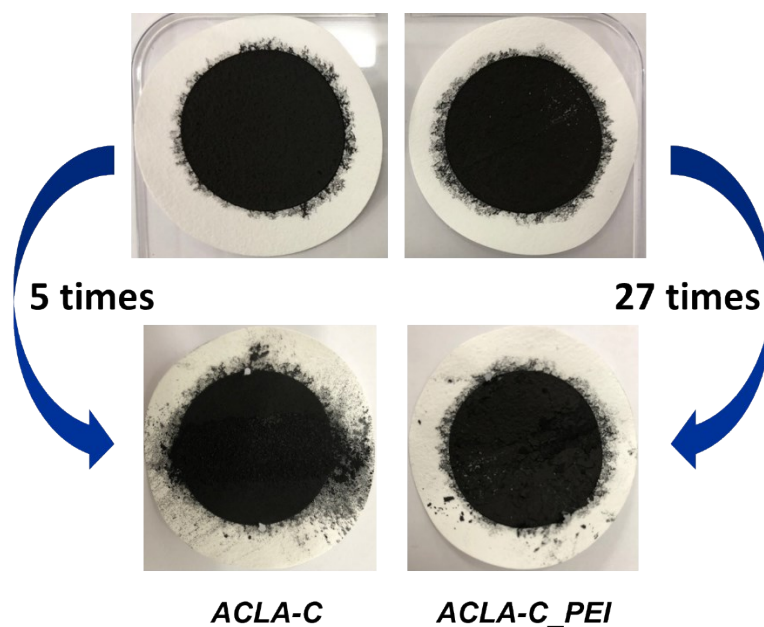

**Figure S8.** (a) Schematic diagram of bending test, (b) before and after bending test images of ACLA-C and ACLA-C\_PEI, taken over 50 times of bending. Bending test was performed with dry samples of ACLA-C and ACLA-C\_PEI. The ACLA photothermal layer showed very poor adhesion properties and detachment of AC powders were observed only after 5 times of bending test. On the other hand, the robustness of ACLA-C\_PEI photothermal layer could be maintained up to 27 times of bending in the same conditions.

**Table S2.** Summary of steam generation rate under 1 and 3 sun irradiance (unit: kg/m<sup>2</sup>h).

|              | 1sun      | 3sun      |
|--------------|-----------|-----------|
| Bulk water   | 0.35±0.01 | 0.86±0.02 |
| Filter paper | 0.86±0.01 | 1.67±0.01 |
| ACLA-D       | 1.09±0.02 | 3.00±0.02 |
| ACLA-C       | 1.17±0.01 | 3.48±0.04 |
| ACLA-C_PEI   | 1.24±0.01 | 3.83±0.01 |
| ACLA-Y       | 1.11±0.03 | 3.13±0.02 |



## The calculation of photo-thermal conversion efficiency

The photo-thermal energy conversion efficiency ( $\eta$ ) is calculated by using the following equation:

$$\eta = \dot{m}h_{LV}/I$$

Here the  $\dot{m}$  is the evaporation rate of water under steady-state conditions (kg/m<sup>2</sup>h) at specific temperature and atmospheric pressure,  $h_{LV}$  represents the total enthalpy of liquid to vapor phase change process, and  $I$  is the power density of solar irradiation (1,000 W/m<sup>2</sup>) used in the experiments.  $h_{LV}$  is the sum of two enthalpies and can be calculated as follows:

$$h_{LV} = \Delta h_{vap} + C_p \Delta T$$

$\Delta h_{vap}$  is the latent heat of vaporization of water under standard atmospheric pressure,  $C_p$  is the specific heat capacity of water (4.2 kJ/kg K), and  $\Delta T$  is the change of water temperature.  $\Delta h_{vap}$  is dependent on the temperature and can be obtained from a specific database ([https://www.engineeringtoolbox.com/water-properties-d\\_1573.html](https://www.engineeringtoolbox.com/water-properties-d_1573.html)). Under 1 sun irradiation the ACLA-C<sub>PEI</sub> photo-thermal conversion efficiency was calculated to be 85.66%.
